# Supplementary figures and images for: Over-Optimistic Projected Future Wheat Yield Potential in the North China Plain: The Role of Future Climate Extremes
Source: MDPI journal article supplement (doi:10.3390/agronomy12010145), 2022-01-07

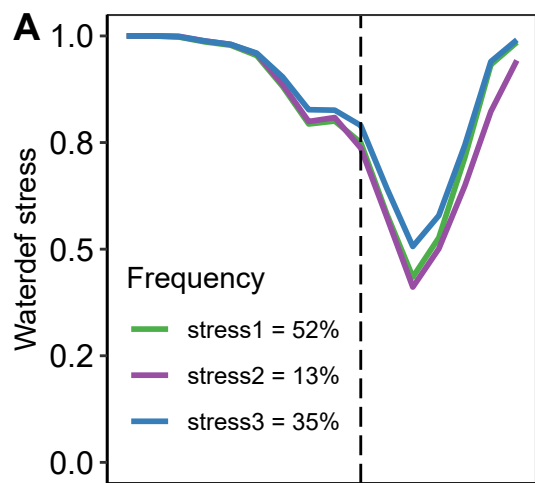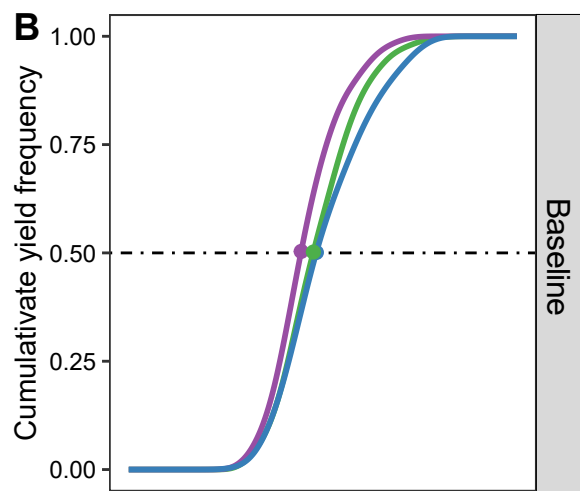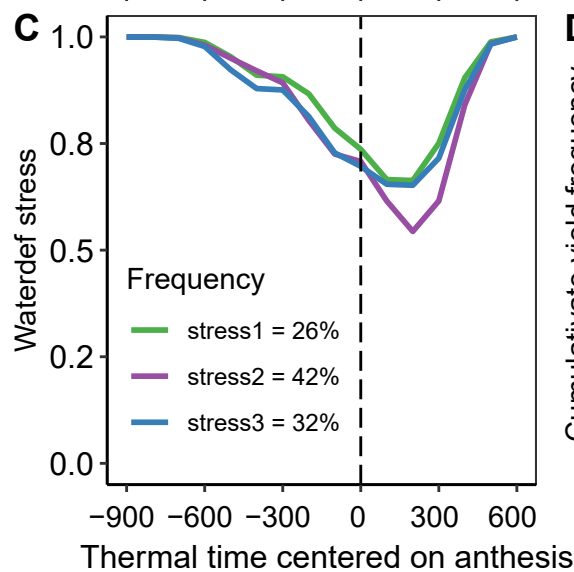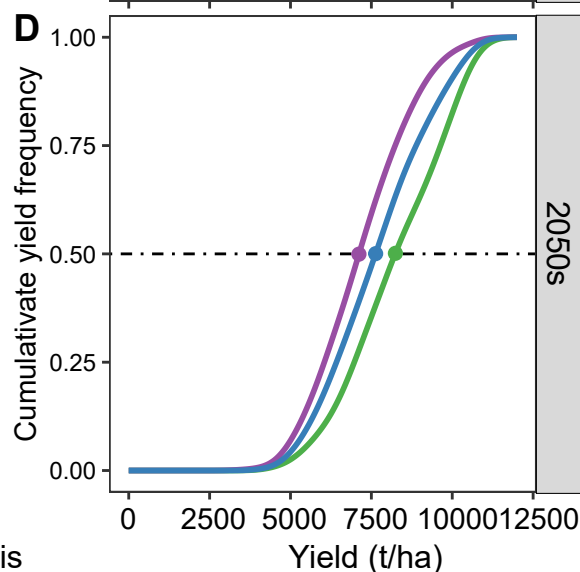

Supplement: s1 [file s1]

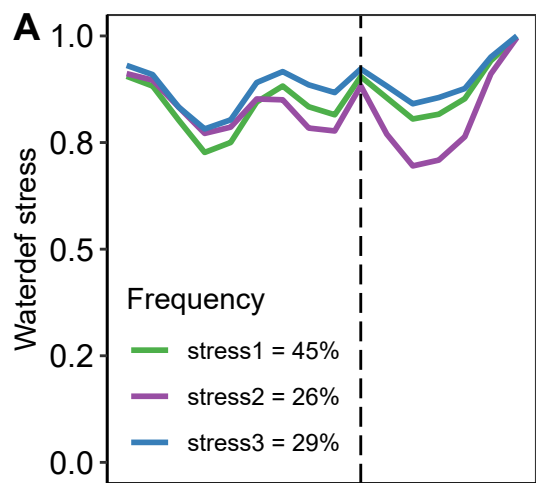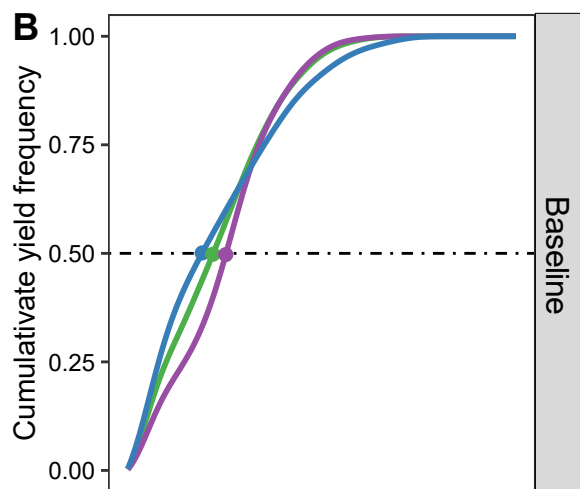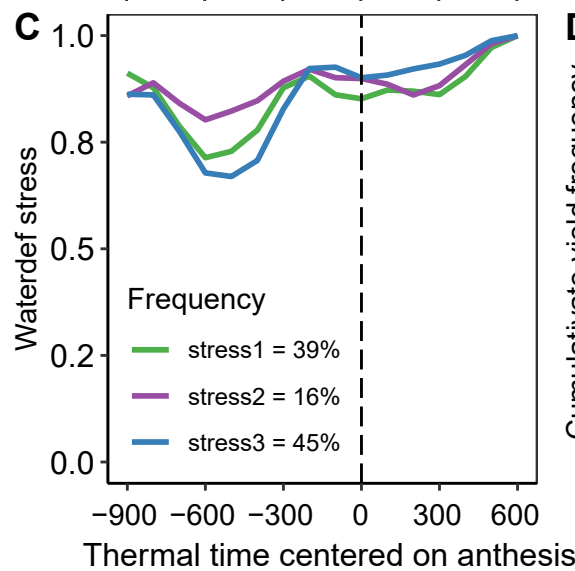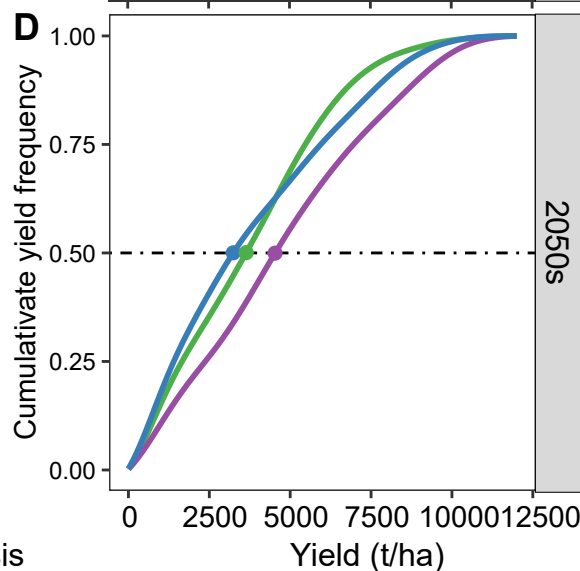

Supplement: s1 [file s1]

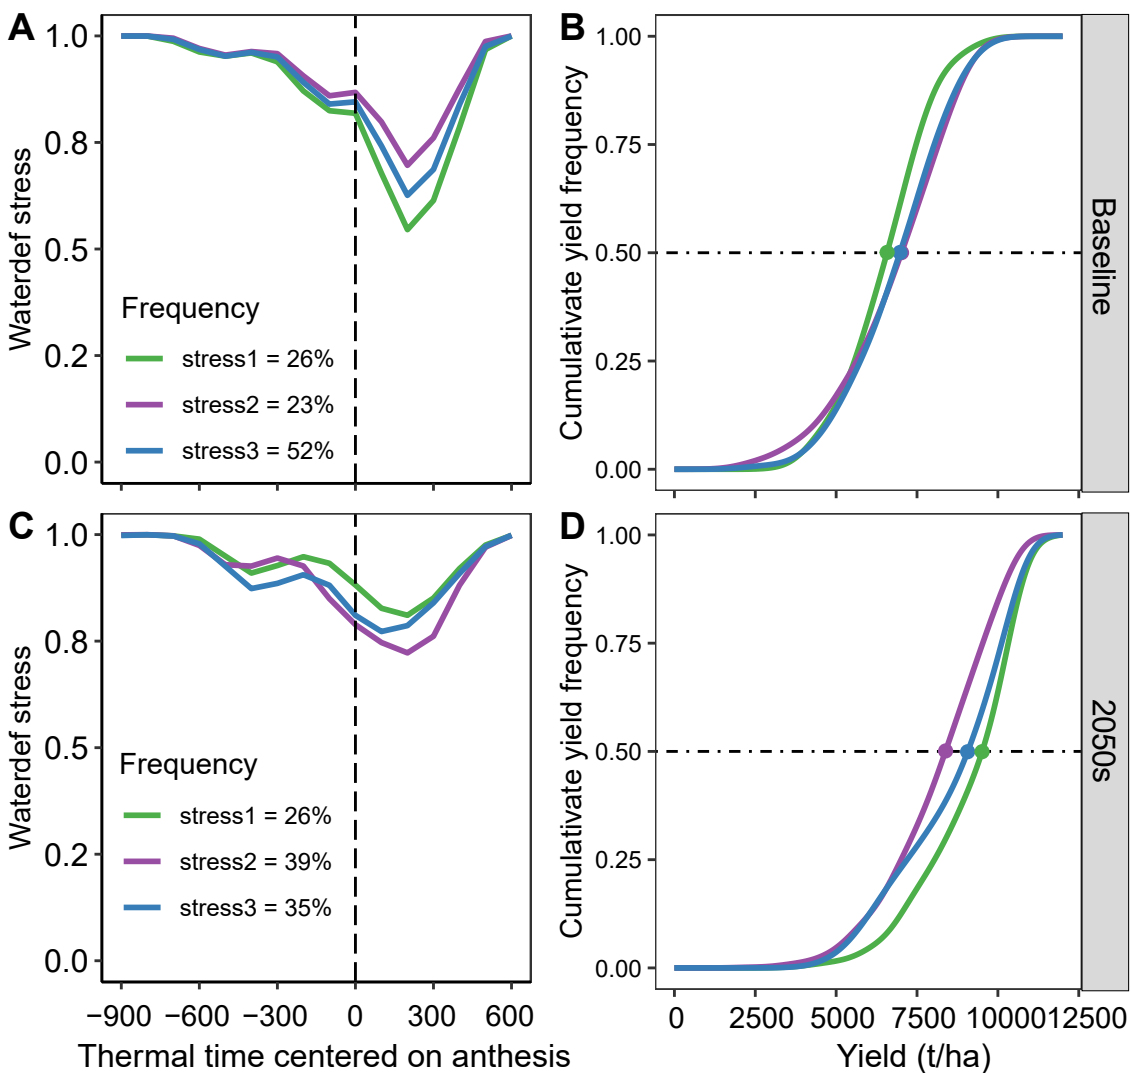

Supplement: s1 [file s1]

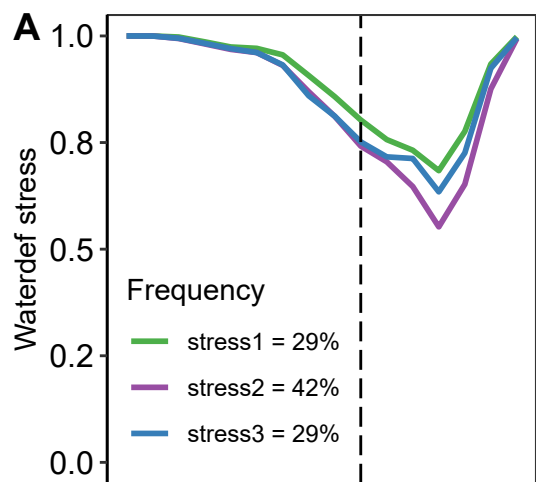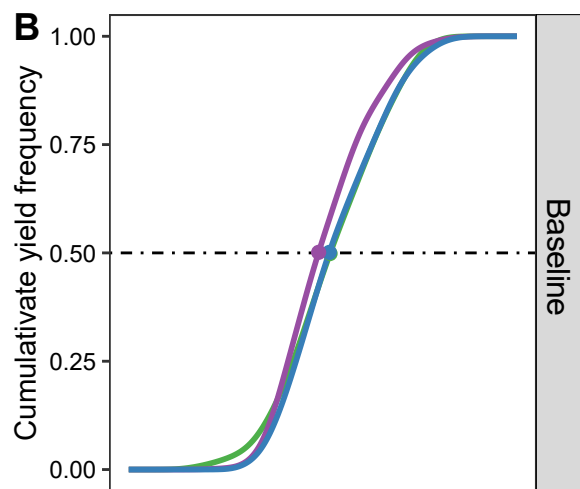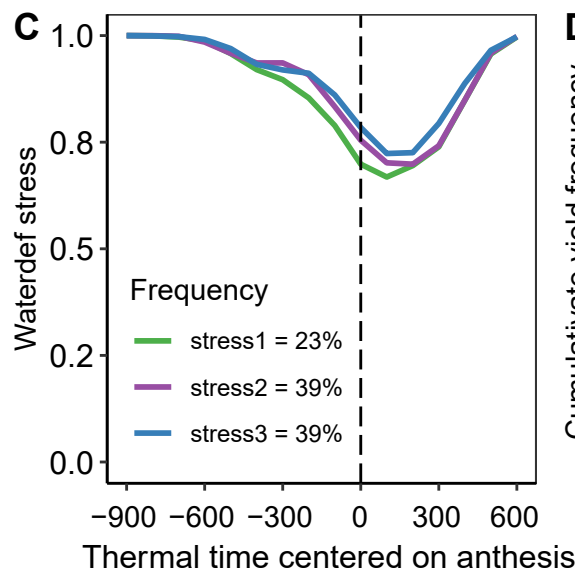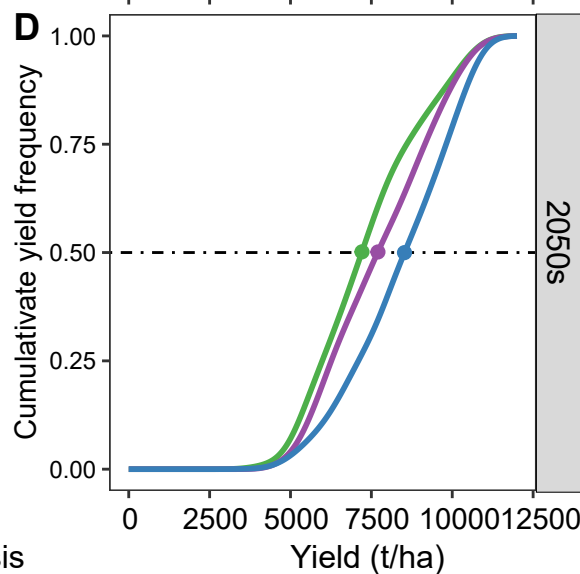

Supplement: s1 [file s1]

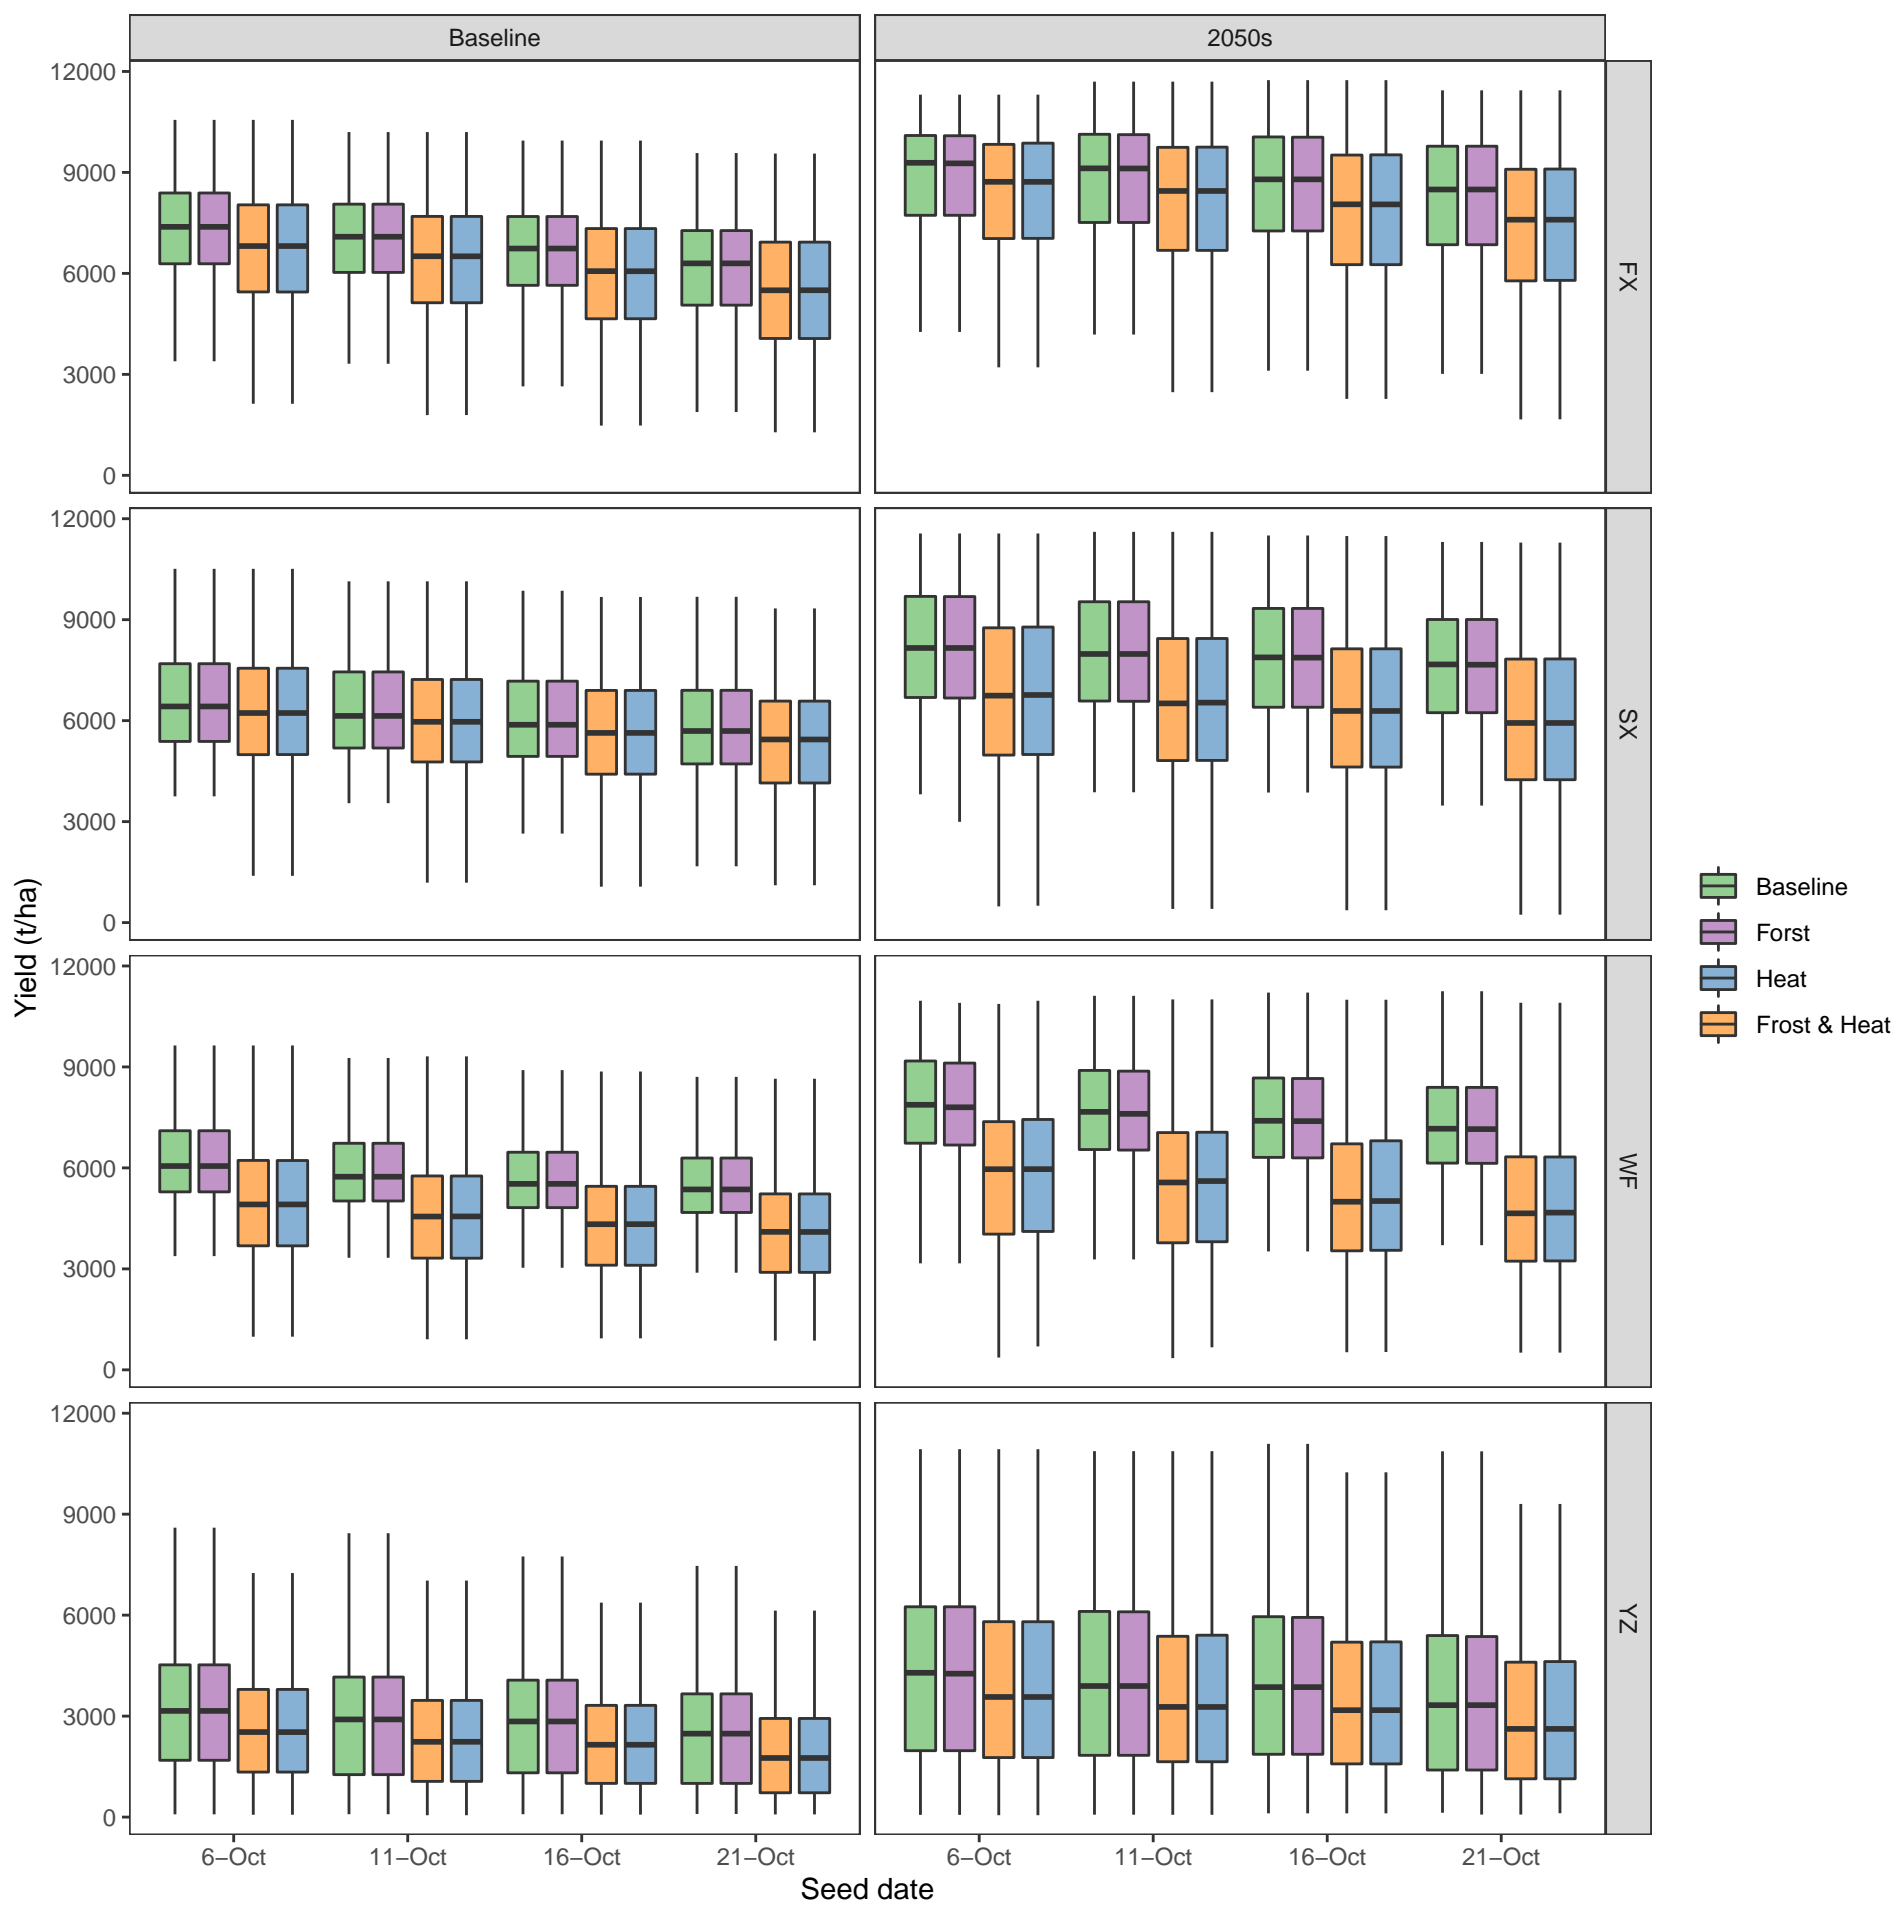

Supplement: s1 [file s1]
